# Supplementary material for: Polygenic Panels Predicting the Susceptibility of Multiple Upper Aerodigestive Tract Cancer in Oral Cancer Patients
Source: MDPI journal article supplement (doi:10.3390/jpm11050425), 2021-05-18
Supplement: s1 [file s1]

**Table S1.** The variables used in the Least Absolute Shrinkage and Selection Operator (LASSO) regression analysis.

| SNP           | BP        | Minor allele | Allele frequency<br>(MPT) (%) | Allele frequency<br>(SPT) (%) | Major allele | CHISQ | P         | OR     |
|---------------|-----------|--------------|-------------------------------|-------------------------------|--------------|-------|-----------|--------|
| Affx-15929578 | 38499997  | A            | 0.03361                       | 0.176                         | G            | 29.33 | 6.10E-08  | 0.1629 |
| rs1229984     | 99318162  | C            | 0.396                         | 0.2364                        | T            | 21.97 | 2.76E-06  | 2.118  |
| rs12675972    | 53104588  | A            | 0.1613                        | 0.3072                        | C            | 19.09 | 1.24E-05  | 0.4338 |
| rs118169127   | 111379676 | C            | 0.088                         | 0.02218                       | T            | 18.92 | 1.36E-05  | 4.253  |
| rs7110866     | 37033281  | G            | 0.312                         | 0.1786                        | A            | 18.3  | 1.89E-05  | 2.086  |
| Affx-32319950 | 53085171  | A            | 0.164                         | 0.3061                        | G            | 18.25 | 1.94E-05  | 0.4447 |
| rs76367287    | 157488600 | C            | 0.124                         | 0.04422                       | A            | 17.61 | 2.71E-05  | 3.06   |
| rs4147539     | 99316323  | -            | 0.16                          | 0.07021                       | TTC          | 16.1  | 6.02E-05  | 2.523  |
| rs77928255    | 99306663  | -            | 0.164                         | 0.07338                       | CT           | 15.92 | 6.60E-05  | 2.477  |
| rs28914775    | 99311969  | T            | 0.1613                        | 0.07313                       | C            | 15.16 | 9.87E-05  | 2.437  |
| rs28913921    | 99316949  | -            | 0.16                          | 0.07313                       | G            | 14.83 | 0.0001173 | 2.414  |
| rs28914783    | 99310445  | T            | 0.184                         | 0.09014                       | C            | 14.83 | 0.0001174 | 2.276  |
| rs1959792     | 25877117  | T            | 0.2621                        | 0.1502                        | C            | 14.57 | 0.0001349 | 2.01   |
| rs7847271     | 115068533 | A            | 0.04                          | 0.1259                        | G            | 14.33 | 0.000153  | 0.2894 |
| rs75330406    | 147481113 | A            | 0.136                         | 0.05973                       | G            | 13.46 | 0.0002433 | 2.478  |
| Affx-22240004 | 35908789  | T            | 0.1                           | 0.03741                       | G            | 12.98 | 0.0003151 | 2.859  |
| rs12346118    | 83353799  | T            | 0.08468                       | 0.1809                        | C            | 12.49 | 0.0004081 | 0.4189 |
| rs2710848     | 168619519 | G            | 0.128                         | 0.2347                        | A            | 12.35 | 0.0004413 | 0.4787 |
| rs9897457     | 7362313   | C            | 0.148                         | 0.2585                        | T            | 12.26 | 0.000462  | 0.4983 |
| rs3760265     | 66875603  | T            | 0.188                         | 0.1003                        | C            | 12.2  | 0.000478  | 2.076  |
| rs61401220    | 50919808  | -            | 0.108                         | 0.04422                       | T            | 12.05 | 0.0005192 | 2.617  |
| rs9490776     | 123468809 | A            | 0.02846                       | 0.09694                       | G            | 11.48 | 0.0007031 | 0.2728 |

| SNP         | BP        | Minor allele | Allele frequency<br>(MPT) (%) | Allele frequency<br>(SPT) (%) | Major allele | CHISQ | P         | OR     |
|-------------|-----------|--------------|-------------------------------|-------------------------------|--------------|-------|-----------|--------|
| rs7184686   | 78381741  | A            | 0.108                         | 0.04592                       | G            | 11.21 | 0.0008116 | 2.516  |
| rs9554264   | 28107218  | T            | 0.348                         | 0.2211                        | C            | 14.72 | 0.0001245 | 1.88   |
| rs1042026   | 99307309  | T            | 0.2903                        | 0.1803                        | C            | 12.61 | 0.0003845 | 1.86   |
| rs11730075  | 99316676  | A            | 0.2903                        | 0.1804                        | G            | 12.52 | 0.0004024 | 1.858  |
| rs975833    | 99280582  | G            | 0.292                         | 0.1832                        | C            | 12.24 | 0.0004678 | 1.839  |
| rs141057871 | 14990529  | A            | 0.2195                        | 0.1241                        | G            | 12.22 | 0.0004732 | 1.984  |
| rs10005290  | 99308253  | A            | 0.288                         | 0.1803                        | C            | 12.17 | 0.0004859 | 1.839  |
| rs2075633   | 99317841  | T            | 0.288                         | 0.1803                        | C            | 12.17 | 0.0004859 | 1.839  |
| rs4873692   | 53033610  | T            | 0.464                         | 0.3367                        | G            | 12.13 | 0.0004972 | 1.705  |
| rs11819833  | 5592180   | C            | 0.252                         | 0.1514                        | T            | 11.97 | 0.000542  | 1.889  |
| rs7129229   | 92367190  | T            | 0.2358                        | 0.1376                        | A            | 11.92 | 0.0005558 | 1.933  |
| rs549317178 | 18609800  | T            | 0.152                         | 0.2611                        | -            | 11.83 | 0.0005824 | 0.5073 |
| rs2066701   | 99317256  | G            | 0.288                         | 0.182                         | A            | 11.74 | 0.0006118 | 1.818  |
| rs848       | 132660808 | A            | 0.4355                        | 0.3123                        | C            | 11.64 | 0.0006448 | 1.699  |
| rs1471535   | 37073188  | A            | 0.252                         | 0.1531                        | C            | 11.51 | 0.0006938 | 1.864  |
| rs6806581   | 23609675  | G            | 0.132                         | 0.233                         | A            | 11.06 | 0.0008801 | 0.5006 |
| rs11255400  | 7845658   | A            | 0.028                         | 0.08503                       | G            | 9.001 | 0.002698  | 0.31   |
| rs112433986 | 216274537 | -            | 0.024                         | 0.07679                       | A            | 8.526 | 0.003501  | 0.2956 |
| rs149089400 | 143802452 | A            | 0.08                          | 0.02041                       | G            | 8.48  | 0.00359   | 4.174  |
| rs60993826  | 231305687 | T            | 0.024                         | 0.07363                       | C            | 7.797 | 0.005232  | 0.3094 |
| rs79454125  | 82271006  | C            | 0.024                         | 0.07313                       | T            | 7.691 | 0.00555   | 0.3117 |
| rs145105977 | 85104040  | C            | 0.024                         | 0.07143                       | T            | 7.308 | 0.006866  | 0.3197 |
| rs12797844  | 70252484  | C            | 0.02016                       | 0.06143                       | T            | 6.35  | 0.01174   | 0.3144 |
